# Supplementary material
Source: Research Square preprint supplement (doi:10.21203/rs.3.rs-8998867/v1)
Supplement: Supplementary file 1 [file 72f532e473dff8d57829bd04.pdf]

**Table S1. Model fit indices for latent class analysis (LCA) models with one to seven latent classes.**

| <b>K</b> | <b>Log-likelihood</b> | <b>No. of parameters</b> | <b>AIC</b> | <b>BIC</b> | <b>SABIC</b> | <b>Entropy</b> |
|----------|-----------------------|--------------------------|------------|------------|--------------|----------------|
| 1        | -3311.84              | 21                       | 6666       | 6743       | 6677         | –              |
| 2        | -3199.27              | 43                       | 6485       | 6644       | 6507         | 0.78           |
| 3        | -3141.20              | 65                       | 6412       | 6653       | 6447         | 0.75           |
| 4        | -3097.59              | 87                       | 6369       | 6691       | 6415         | 0.81           |
| 5        | -3066.98              | 109                      | 6352       | 6756       | 6410         | 0.87           |
| 6        | -3041.42              | 131                      | 6345       | 6830       | 6415         | 0.85           |
| 7        | -3015.87              | 153                      | 6338       | 6904       | 6419         | 0.89           |

**Note.** Reported indices include the log-likelihood, number of estimated parameters, Akaike Information Criterion (AIC), Bayesian Information Criterion (BIC), sample-size adjusted BIC (SABIC), and entropy. Lower values of AIC, BIC, and SABIC indicate better model fit, while higher entropy values indicate clearer class separation. Entropy is not defined for the one-class model.

**Figure S1. Average posterior probability of assignment (APPA) for each latent class in the four-class latent class analysis model.**

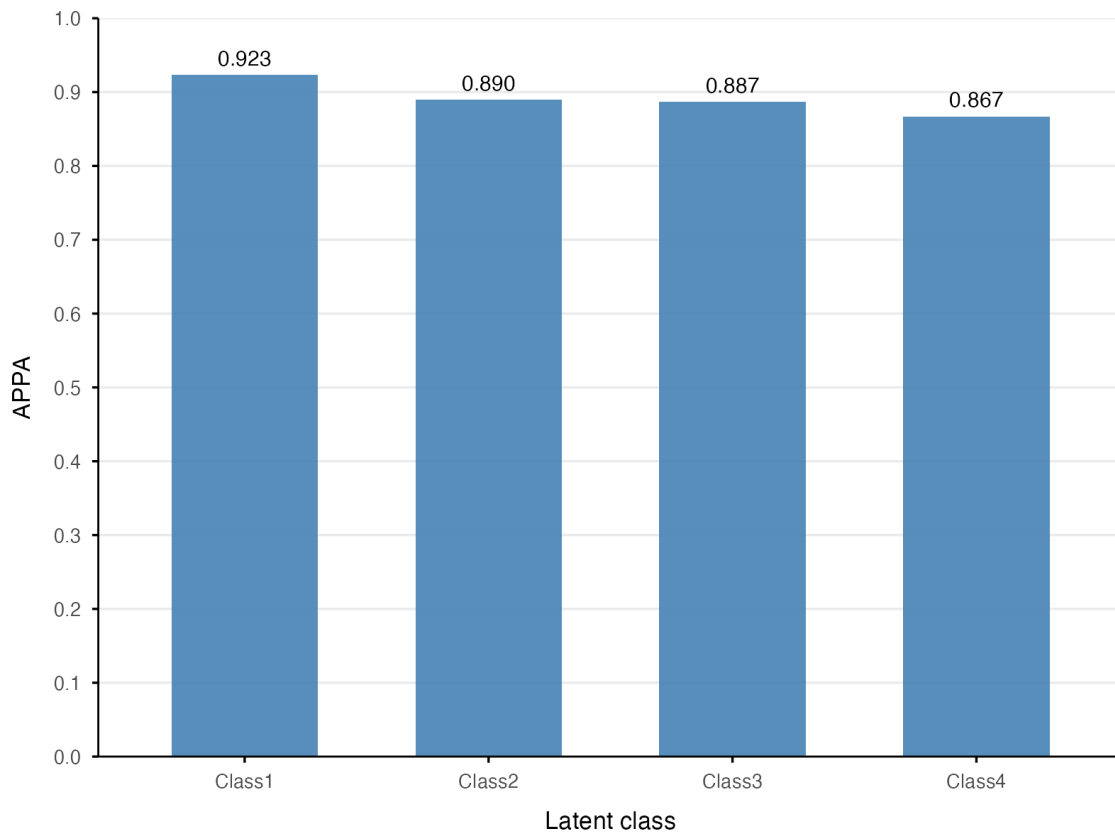

APPA represents the mean posterior probability that individuals are correctly assigned to their most likely latent class. An APPA value of 0.70 or higher is generally considered indicative of acceptable classification quality. In the present model, all latent classes demonstrated APPA values exceeding 0.85, indicating good classification accuracy and clear separation between latent classes.

**Table S2. Results of the bootstrap likelihood ratio test (BLRT) comparing latent class models with K and K–1 classes.**

| <b>Model comparison</b> | <b>LR statistic</b> | <b>Bootstrap replications (target)</b> | <b>Valid replications</b> | <b>Failed replications</b> | <b><i>p</i>-value</b> |
|-------------------------|---------------------|----------------------------------------|---------------------------|----------------------------|-----------------------|
| 1 vs 2                  | 225.0               | 200                                    | 200                       | 0                          | 0.005                 |
| 2 vs 3                  | 116.0               | 200                                    | 200                       | 0                          | 0.005                 |
| 3 vs 4                  | 87.2                | 200                                    | 200                       | 0                          | 0.005                 |
| 4 vs 5                  | 61.2                | 200                                    | 200                       | 0                          | 0.005                 |
| 5 vs 6                  | 52.1                | 200                                    | 197                       | 3                          | 0.116                 |
| 6 vs 7                  | 49.0                | 200                                    | 200                       | 0                          | 0.189                 |

The likelihood ratio (LR) statistic reflects the improvement in model fit when adding one additional class. P-values were estimated based on 200 bootstrap replications. A significant p-value ( $p < 0.05$ ) indicates that the model with K classes provides a statistically better fit than the model with K–1 classes.
